# Supplementary material for: Transepithelial transport and cytoprotection of novel antioxidant peptides isolated from simulated gastrointestinal digestion of Xuanwei ham
Source: Royal Society of Chemistry journal article supplement (doi:10.1039/d2fo03614b), 2023-01-01
Supplement: d2fo03614b1.pdf [file d2fo03614b1.pdf]

**Table S1 The composition of electrolytes of the simulation digestion *in vitro* and the electrolyte concentration in the final digestion mixture.**

| Constituent                                       | Stock conc.             | SSF                       |              | SGF                        |              | SIF                        |              |                            |
|---------------------------------------------------|-------------------------|---------------------------|--------------|----------------------------|--------------|----------------------------|--------------|----------------------------|
|                                                   |                         | pH 7.0                    |              | pH 2.5                     |              | pH 7.0                     |              |                            |
|                                                   |                         | Vol. of stock             | Conc. in SSF | Vol. of stock              | Conc. in SGF | Vol. of stock              | Conc. in SIF |                            |
|                                                   | <b>g L<sup>-1</sup></b> | <b>mol L<sup>-1</sup></b> | <b>mL</b>    | <b>mmol L<sup>-1</sup></b> | <b>mL</b>    | <b>mmol L<sup>-1</sup></b> | <b>mL</b>    | <b>mmol L<sup>-1</sup></b> |
| KCl                                               | 37.30                   | 0.50                      | 15.10        | 15.10                      | 6.90         | 6.90                       | 6.80         | 6.80                       |
| KH <sub>2</sub> PO <sub>4</sub>                   | 68.00                   | 0.50                      | 3.70         | 3.70                       | 0.90         | 0.90                       | 0.80         | 0.80                       |
| NaHCO <sub>3</sub>                                | 84.00                   | 1.00                      | 6.80         | 13.60                      | 12.50        | 25.00                      | 42.50        | 85.00                      |
| NaCl                                              | 117.00                  | 2.00                      | /            | /                          | 11,80        | 47.20                      | 9.60         | 38.40                      |
| MgCl <sub>2</sub> (H <sub>2</sub> O) <sub>6</sub> | 30.50                   | 0.15                      | 0.50         | 0.15                       | 0.40         | 0.10                       | 1.10         | 0.33                       |
| (NH) <sub>2</sub> CO <sub>3</sub>                 | 48.00                   | 0.50                      | 0.06         | 0.06                       | 0.50         | 0.50                       | /            | /                          |
| CaCl <sub>2</sub> (H <sub>2</sub> O) <sub>2</sub> | 44.10                   | 0.30                      |              | 1.50                       | 0.25         | 0.15                       | 1.00         | 0.60                       |
|                                                   |                         |                           |              | (0.75*)                    |              | (0.075*)                   |              | (0.30*)                    |

The volumes are calculated for a final volume of 500 mL for each simulated fluid.

\* in brackets is the corresponding Ca<sup>2+</sup> concentration in the final digestion mixture.

The stock of NaHCO<sub>3</sub> could be stored at 2-5°C for one month after filtering with 0.45 µm membrane.

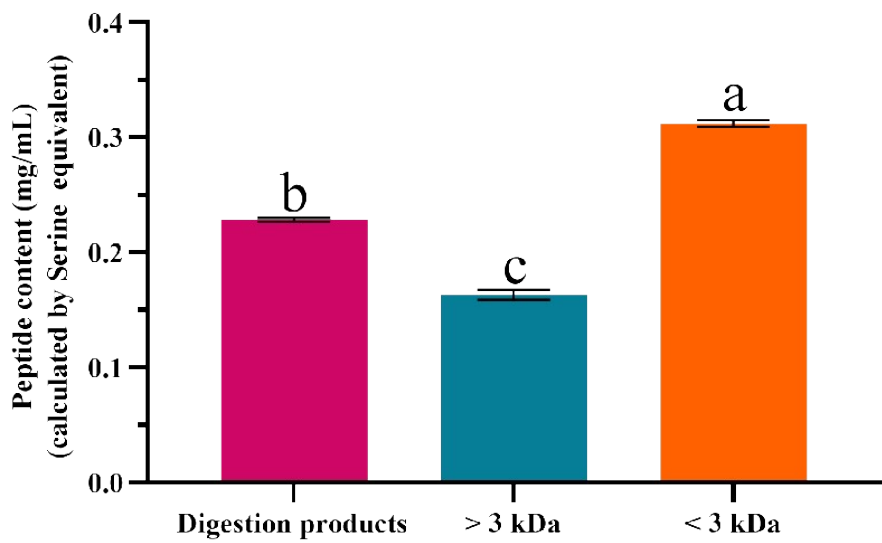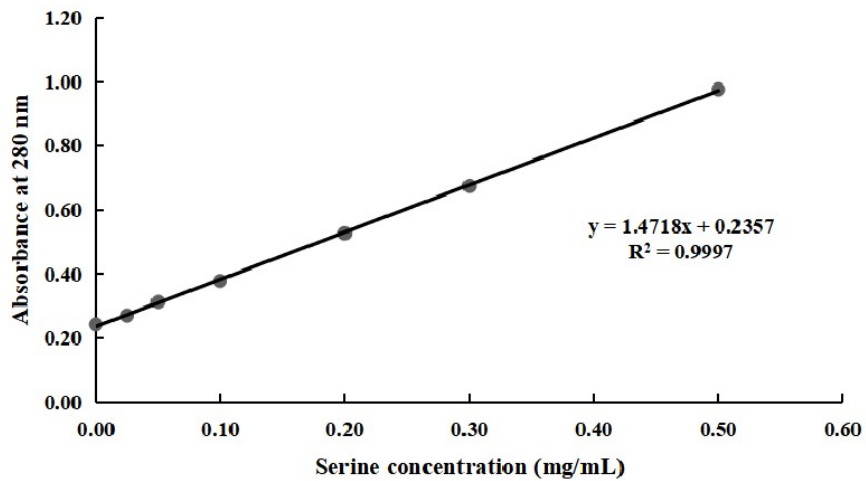

Figure S1 The peptide content in digestion products and fractions after ultrafiltration:  
 XHDP-I and XHDP-II  
 (A) Peptide content (B) Standard curve for Serine

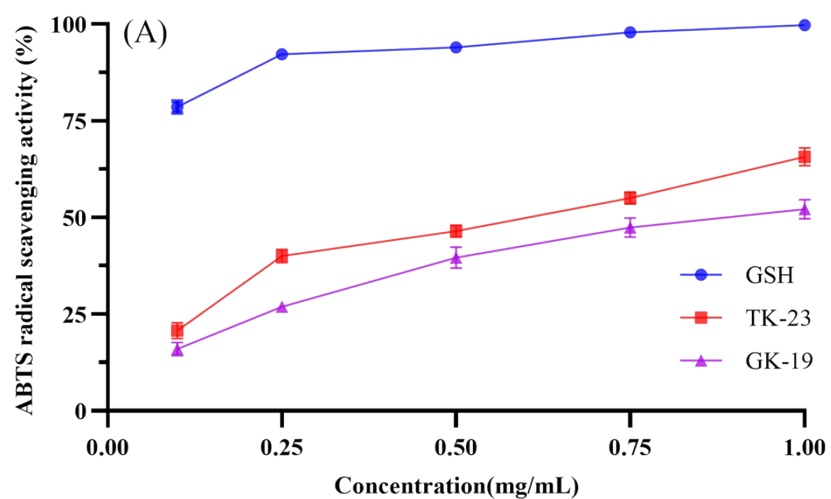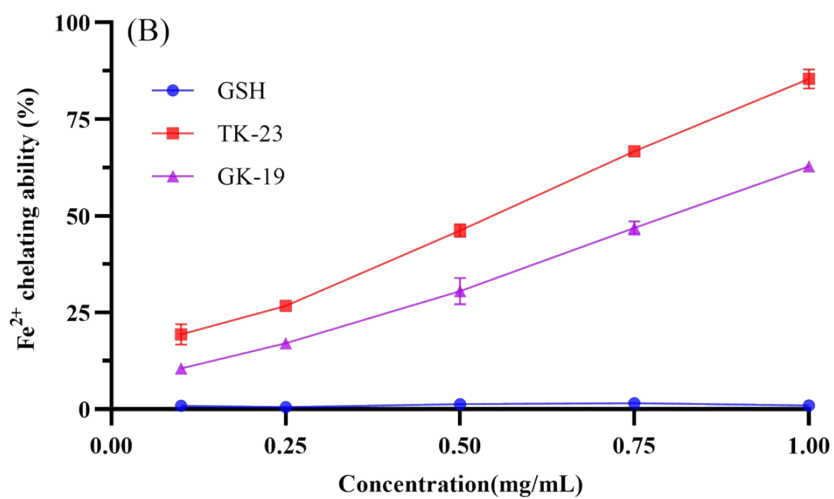

Figure S2 Antioxidant activities of synthesized peptide TK-23 and GK-19  
(A) ABTS radical scavenging activity (B) Fe<sup>2+</sup> chelating ability
